# Supplementary material for: Construction and analysis of macrophage infiltration related circRNA-miRNA-mRNA regulatory networks in hepatocellular carcinoma
Source: PeerJ. 2020 Oct 20;8:e10198. doi: 10.7717/peerj.10198 (PMC7583625; doi:10.7717/peerj.10198)
Supplement: Supplemental Information 6 [file peerj-08-10198-s006.xlsx]

## Sheet: Macrophage related DEmRNA
mRNA	dysregulation
LCAT	down
CYP39A1	down
ESR1	down
KBTBD11	down
ASS1	down
C1R	down
ACADS	down
ASPG	down
SLC25A47	down
GSTZ1	down
C9	down
UROC1	down
HGFAC	down
AKR7A3	down
ALPL	down
PEMT	down
GCGR	down
PCK1	down
FITM1	down
NNMT	down
HOGA1	down
C6	down
SAA2-SAA4	down
DHODH	down
PHGDH	down
SKAP1	down
INS-IGF2	down
OGDHL	down
ADH1C	down
CFHR3	down
ABCA8	down
MBL2	down
SDS	down
OXT	down
IGFBP1	down
HS3ST3B1	down
SLC13A5	down
APCS	down
SAA2	down
PLA2G2A	down
SAA1	down
CENPF	up
NEK2	up
ASPM	up
UBE2T	up
HJURP	up
HMMR	up
CCNB1	up
TBCE	up
KIF20A	up
RACGAP1	up
GBA	up
ANLN	up
CDKN3	up
PRC1	up
PBK	up
TROAP	up
FAM189B	up
AURKA	up
CDCA8	up
TOP2A	up
NUF2	up
MELK	up
KIFC1	up
CDCA5	up
KLHL12	up
CDK1	up
KIF4A	up
CDC25C	up
NUSAP1	up
TMCO1	up
CCNB2	up
UBE2C	up
FAM83D	up
SKA1	up
CDC20	up
UBE2Q1	up
PIGC	up
KIF2C	up
IPO9	up
CCDC34	up
BIRC5	up
UBQLN4	up
SPC24	up
PTTG1	up
SPC25	up
MKI67	up
RRM2	up
SLC26A6	up
RNASEH2A	up
PYGO2	up
NCAPH	up
REPIN1	up
NDC80	up
AURKB	up
LARP1	up
SNX27	up
DTL	up
MARK4	up
TAF6	up
NCAPG	up
CHAF1A	up
AKIP1	up
PLOD3	up
GNPAT	up
UCK2	up
STMN1	up
MRPL9	up
PIGT	up
TMEM104	up
CDT1	up
MND1	up
ECT2	up
ARPC1A	up
TCF19	up
NCSTN	up
VPS45	up
CENPW	up
RFC4	up
TMEM106C	up
SAE1	up
E2F1	up
SF3B4	up
CCT6A	up
ZWINT	up
GINS1	up
EZH2	up
ASF1B	up
CKAP2	up
ATP6AP1	up
ZNF282	up
PLK1	up
FEN1	up
IQGAP3	up
CDKN2C	up
BCL9	up
XPO5	up
ILF2	up
TUBG1	up
FAM20B	up
AGPAT1	up
DARS2	up
IP6K1	up
PDZD11	up
BLOC1S3	up
ZNF687	up
UBAP2L	up
UBE2S	up
NEU1	up
DUSP12	up
SH3BP5L	up
MYBL2	up
MSH2	up
PSMD10	up
CTSA	up
XRCC1	up
PSMD2	up
PSPH	up
MDK	up
CSTF2	up
CDC45	up
TOMM20	up
FLVCR1	up
TARBP1	up
GMNN	up
PSME3	up
POLD1	up
CCNA2	up
FOXM1	up
DTYMK	up
SLC41A3	up
NPLOC4	up
CKS1B	up
IRAK1	up
HGS	up
ZNF219	up
MCM7	up
MCM3	up
TCOF1	up
KPNA2	up
ARHGEF11	up
CDC6	up
TSEN15	up
MCM4	up
SLC39A1	up
NDRG3	up
ARPC5	up
FAM111B	up
TSPAN17	up
CCDC97	up
MCM2	up
C17orf58	up
RECQL4	up
DNAJB11	up
RPN2	up
MAZ	up
SLC4A2	up
TPX2	up
DSN1	up
SPATS2	up
TK1	up
CENPM	up
SMG5	up
PRKDC	up
CCHCR1	up
CBX1	up
PCNA	up
ANO10	up
CLN6	up
ACLY	up
ADAM15	up
CCT5	up
MLEC	up
TBC1D16	up
NCAPD2	up
ABCF2	up
SLC39A7	up
STIP1	up
UBL4A	up
LAMC1	up
SHC1	up
VBP1	up
CDKN2A	up
CUL7	up
HSP90AB1	up
TRAF2	up
NDUFA4L2	up
CCDC137	up
MAFG	up
TUBA1B	up
RAP2A	up
SMARCA4	up
ABCD1	up
CHD1L	up
DUSP9	up
ANKRD52	up
TACC3	up
MCM6	up
HMGB2	up
BCAT2	up
NARF	up
TPD52L2	up
NACC1	up
CACYBP	up
PYGB	up
GPC3	up
GRK6	up
MCM5	up
LAPTM4B	up
MPZL1	up
TYMS	up
CKAP4	up
G6PD	up
KLF13	up
PSKH1	up
DDX39A	up
ADCY6	up
GTPBP2	up
POC1A	up
CAD	up
TMCO3	up
SOX12	up
IGSF3	up
CBX4	up
GLA	up
GRAMD1A	up
LMNB1	up
RMI2	up
TCF3	up
CPD	up
SORT1	up
ADM2	up
PRKAB2	up
TOR3A	up
KIAA1522	up
TAGLN2	up
ITPKA	up
CDC25B	up
GNAZ	up
CKS2	up
RNF157	up
NRM	up
APOBEC3B	up
BLVRA	up
MAGEA1	up
CRIP3	up
C1QL1	up
TMEM98	up
PEG10	up
SSX1	up
MAGEA3	up
PYCR1	up
MAGEA6	up
CSAG1	up

## Sheet: circRNA network
miRNA	mRNA	circRNA
hsa-miR-105-5p	HMMR	hsa_circ_0003763
hsa-miR-127-5p	EZH2	hsa_circ_0000520
hsa-miR-139-5p	CDCA8	hsa_circ_0091570
hsa-miR-139-5p	CDCA8	hsa_circ_0007456
hsa-miR-139-5p	KPNA2	hsa_circ_0091570
hsa-miR-139-5p	KPNA2	hsa_circ_0007456
hsa-miR-139-5p	PRC1	hsa_circ_0091570
hsa-miR-139-5p	PRC1	hsa_circ_0007456
hsa-miR-139-5p	TOP2A	hsa_circ_0091570
hsa-miR-139-5p	TOP2A	hsa_circ_0007456
hsa-miR-142-5p	DTL	hsa_circ_0002980
hsa-miR-150-5p	KIF4A	hsa_circ_0001955
hsa-miR-150-5p	KIF4A	hsa_circ_0006302
hsa-miR-150-5p	RACGAP1	hsa_circ_0001955
hsa-miR-150-5p	RACGAP1	hsa_circ_0006302
hsa-miR-150-5p	NCAPG	hsa_circ_0001955
hsa-miR-150-5p	NCAPG	hsa_circ_0006302
hsa-miR-150-5p	NEK2	hsa_circ_0001955
hsa-miR-150-5p	NEK2	hsa_circ_0006302
hsa-miR-182-5p	UBE2T	hsa_circ_0011385
hsa-miR-182-5p	ANLN	hsa_circ_0011385
hsa-miR-182-5p	PRC1	hsa_circ_0011385
hsa-miR-182-5p	CDK1	hsa_circ_0011385
hsa-miR-182-5p	BIRC5	hsa_circ_0011385
hsa-miR-182-5p	DTL	hsa_circ_0011385
hsa-miR-182-5p	NCAPD2	hsa_circ_0011385
hsa-miR-195-5p	ANLN	hsa_circ_0003763
hsa-miR-195-5p	ANLN	hsa_circ_0001955
hsa-miR-195-5p	RACGAP1	hsa_circ_0003763
hsa-miR-195-5p	RACGAP1	hsa_circ_0001955
hsa-miR-214-3p	SKA1	hsa_circ_0003763
hsa-miR-214-3p	SKA1	hsa_circ_0004913
hsa-miR-214-3p	SKA1	hsa_circ_0001955
hsa-miR-214-3p	CENPM	hsa_circ_0003763
hsa-miR-214-3p	CENPM	hsa_circ_0004913
hsa-miR-214-3p	CENPM	hsa_circ_0001955
hsa-miR-214-3p	MCM7	hsa_circ_0003763
hsa-miR-214-3p	MCM7	hsa_circ_0004913
hsa-miR-214-3p	MCM7	hsa_circ_0001955
hsa-miR-214-3p	MCM5	hsa_circ_0003763
hsa-miR-214-3p	MCM5	hsa_circ_0004913
hsa-miR-214-3p	MCM5	hsa_circ_0001955
hsa-miR-221-3p	KIF20A	hsa_circ_0006168
hsa-miR-221-3p	KPNA2	hsa_circ_0006168
hsa-miR-223-3p	KIF4A	hsa_circ_0058493
hsa-miR-223-3p	ECT2	hsa_circ_0058493
hsa-miR-335-5p	BIRC5	hsa_circ_0003570
hsa-miR-335-5p	TOP2A	hsa_circ_0003570
hsa-miR-369-3p	KIF20A	hsa_circ_0008274
hsa-miR-369-3p	KIF20A	hsa_circ_0006302
hsa-miR-375	KIF4A	hsa_circ_0067934
hsa-miR-376c-3p	KPNA2	hsa_circ_0001955
hsa-miR-376c-3p	DTL	hsa_circ_0001955
hsa-miR-381-3p	UBE2C	hsa_circ_0008274
hsa-miR-381-3p	CCNA2	hsa_circ_0008274
hsa-miR-381-3p	ECT2	hsa_circ_0008274
hsa-miR-381-3p	ASF1B	hsa_circ_0008274
hsa-miR-424-5p	ANLN	hsa_circ_0003763
hsa-miR-424-5p	ANLN	hsa_circ_0001955
hsa-miR-424-5p	RACGAP1	hsa_circ_0003763
hsa-miR-424-5p	RACGAP1	hsa_circ_0001955
hsa-miR-497-5p	RACGAP1	hsa_circ_0001955
hsa-miR-497-5p	RACGAP1	hsa_circ_0003763
hsa-miR-497-5p	ANLN	hsa_circ_0001955
hsa-miR-497-5p	ANLN	hsa_circ_0003763
hsa-miR-511-5p	CDC25C	hsa_circ_0027364
hsa-miR-889-3p	MELK	hsa_circ_0008274
hsa-miR-889-3p	MELK	hsa_circ_0027364
hsa-miR-889-3p	MELK	hsa_circ_0006302
hsa-miR-889-3p	KIF20A	hsa_circ_0008274
hsa-miR-889-3p	KIF20A	hsa_circ_0027364
hsa-miR-889-3p	KIF20A	hsa_circ_0006302
hsa-miR-9-5p	MELK	hsa_circ_0001955
hsa-miR-9-5p	NCAPG	hsa_circ_0001955
hsa-miR-9-5p	HMMR	hsa_circ_0001955
hsa-miR-96-5p	ANLN	hsa_circ_0011385
hsa-miR-96-5p	ECT2	hsa_circ_0011385
hsa-miR-96-5p	TOP2A	hsa_circ_0011385
hsa-miR-96-5p	DTL	hsa_circ_0011385
hsa-miR-96-5p	CDK1	hsa_circ_0011385
hsa-miR-96-5p	PRC1	hsa_circ_0011385

## Sheet: hub circRNA network
miRNA	mRNA	circRNA
hsa-miR-139-5p	CDCA8	hsa_circ_0091570
hsa-miR-139-5p	CDCA8	hsa_circ_0007456
hsa-miR-139-5p	KPNA2	hsa_circ_0091570
hsa-miR-139-5p	KPNA2	hsa_circ_0007456
hsa-miR-139-5p	PRC1	hsa_circ_0091570
hsa-miR-139-5p	PRC1	hsa_circ_0007456
hsa-miR-139-5p	TOP2A	hsa_circ_0091570
hsa-miR-139-5p	TOP2A	hsa_circ_0007456

## Sheet:  TCGA risk score
id	time	status	risk_score	risk
TCGA-2Y-A9GS-01A	24.1333	1	1.88991	high
TCGA-2Y-A9GT-01A	54.1333	1	0.260004	low
TCGA-2Y-A9GU-01A	64.6333	0	0.946088	low
TCGA-2Y-A9GV-01A	84.4	1	0.442718	low
TCGA-2Y-A9GW-01A	42.3667	1	1.2027	high
TCGA-2Y-A9GX-01A	81.4	0	0.697984	low
TCGA-2Y-A9GY-01A	25.2333	1	4.29096	high
TCGA-2Y-A9GZ-01A	28.2667	1	1.25587	high
TCGA-2Y-A9H0-01A	122.5	0	1.82892	high
TCGA-2Y-A9H1-01A	40.9667	1	0.898432	low
TCGA-2Y-A9H2-01A	57.7	0	2.12139	high
TCGA-2Y-A9H3-01A	50.5333	0	0.397112	low
TCGA-2Y-A9H4-01A	48.4	0	0.824725	low
TCGA-2Y-A9H5-01A	18.5	1	0.638828	low
TCGA-2Y-A9H6-01A	11.9	0	0.276759	low
TCGA-2Y-A9H7-01A	38.9333	0	0.842672	low
TCGA-2Y-A9H8-01A	21.1	1	2.30527	high
TCGA-2Y-A9H9-01A	23.2333	0	0.637894	low
TCGA-2Y-A9HA-01A	1.2	1	1.12093	high
TCGA-2Y-A9HB-01A	8.66667	0	0.51188	low
TCGA-3K-AAZ8-01A	13.2	0	0.555189	low
TCGA-4R-AA8I-01A	8.73333	1	1.28044	high
TCGA-5C-A9VG-01A	10.9333	0	1.85519	high
TCGA-5C-A9VH-01A	10.7333	0	1.22157	high
TCGA-5R-AA1C-01A	17.3333	0	1.32938	high
TCGA-5R-AA1D-01A	14.9667	0	0.300871	low
TCGA-5R-AAAM-01A	1.53333	1	0.461359	low
TCGA-BC-4072-01B	49.6667	1	1.40845	high
TCGA-BC-4073-01B	28.3	0	1.62351	high
TCGA-BC-A10Q-01A	37.8333	1	0.815471	low
TCGA-BC-A10R-01A	10.2667	1	0.744378	low
TCGA-BC-A10S-01A	47.4333	1	0.835515	low
TCGA-BC-A10T-01A	27.9	1	0.998983	low
TCGA-BC-A10U-01A	27.9	1	3.03114	high
TCGA-BC-A10W-01A	3.03333	1	2.3753	high
TCGA-BC-A10X-01A	25.6667	1	0.355751	low
TCGA-BC-A10Y-01A	23.7	1	1.72393	high
TCGA-BC-A10Z-01A	1.13333	1	1.22947	high
TCGA-BC-A110-01A	70.5333	1	0.815201	low
TCGA-BC-A112-01A	5.1	1	3.73363	high
TCGA-BC-A216-01A	45.0333	0	2.07285	high
TCGA-BC-A217-01A	46.5667	1	1.83666	high
TCGA-BC-A3KG-01A	22.6667	0	1.50623	high
TCGA-BC-A5W4-01A	18.2333	1	2.28436	high
TCGA-BC-A69H-01A	14.8	0	2.4873	high
TCGA-BC-A69I-01A	12.9	0	0.529268	low
TCGA-BC-A8YO-01A	18.7333	0	2.1836	high
TCGA-BD-A2L6-01A	45.4333	0	0.858637	low
TCGA-BD-A3EP-01A	13.6333	0	1.35321	high
TCGA-BD-A3ER-01A	37.1667	0	1.23461	high
TCGA-CC-5258-01A	4.3	1	4.0568	high
TCGA-CC-5259-01A	8.33333	0	0.558904	low
TCGA-CC-5260-01A	2.9	1	1.82173	high
TCGA-CC-5261-01A	3.23333	1	0.853913	low
TCGA-CC-5262-01A	3.43333	1	3.60134	high
TCGA-CC-5263-01A	4.3	1	2.41072	high
TCGA-CC-5264-01A	3.4	1	4.0463	high
TCGA-CC-A123-01A	7.3	0	2.06039	high
TCGA-CC-A1HT-01A	3.36667	1	3.71645	high
TCGA-CC-A3M9-01A	10	1	5.74084	high
TCGA-CC-A3MA-01A	10.1	1	4.74909	high
TCGA-CC-A3MB-01A	10.5	1	1.06094	high
TCGA-CC-A3MC-01A	12.1	0	1.42617	high
TCGA-CC-A5UC-01A	11.5667	1	4.24527	high
TCGA-CC-A5UD-01A	10.1333	1	1.9997	high
TCGA-CC-A5UE-01A	9.06667	1	4.71842	high
TCGA-CC-A7IE-01A	7.23333	1	1.30923	high
TCGA-CC-A7IF-01A	21.6333	1	0.769598	low
TCGA-CC-A7IG-01A	9.96667	1	3.7297	high
TCGA-CC-A7IH-01A	12.1667	0	0.504934	low
TCGA-CC-A7II-01A	13.3	0	6.10231	high
TCGA-CC-A7IJ-01A	12.7333	0	5.03567	high
TCGA-CC-A7IK-01A	8.73333	1	3.97724	high
TCGA-CC-A7IL-01A	9.26667	1	0.635139	low
TCGA-CC-A8HS-01A	10	1	1.02013	low
TCGA-CC-A8HT-01A	4.66667	1	3.96226	high
TCGA-CC-A8HU-01A	11.4667	1	2.19854	high
TCGA-CC-A8HV-01A	9.3	1	1.53725	high
TCGA-CC-A9FS-01A	7.03333	0	0.848775	low
TCGA-CC-A9FW-01A	8.26667	0	0.83284	low
TCGA-DD-A113-01A	80.8333	0	1.22913	high
TCGA-DD-A114-01A	38.3	1	6.67406	high
TCGA-DD-A115-01A	84.7333	1	1.87621	high
TCGA-DD-A116-01A	54.0667	1	0.73787	low
TCGA-DD-A118-01A	114.567	0	0.772607	low
TCGA-DD-A119-01A	7.43333	1	1.58145	high
TCGA-DD-A11A-01A	2.63333	1	0.662791	low
TCGA-DD-A11C-01A	22.0667	0	1.40218	high
TCGA-DD-A11D-01A	52	1	0.668881	low
TCGA-DD-A1EA-01A	80.5	0	0.673676	low
TCGA-DD-A1EB-01A	67.2333	0	1.11053	high
TCGA-DD-A1EC-01A	20.0667	0	1.38025	high
TCGA-DD-A1ED-01A	76.7	0	0.312148	low
TCGA-DD-A1EE-01A	11.6333	1	1.56016	high
TCGA-DD-A1EF-01A	13.1333	1	1.26138	high
TCGA-DD-A1EG-01A	45.7333	1	1.47805	high
TCGA-DD-A1EH-01A	49.8333	0	0.609282	low
TCGA-DD-A1EI-01A	6.1	0	1.70664	high
TCGA-DD-A1EJ-01A	33.5	1	1.7581	high
TCGA-DD-A1EK-01A	18.6	1	1.25874	high
TCGA-DD-A1EL-01A	13.8333	1	3.58659	high
TCGA-DD-A39V-01A	21.4333	1	1.09999	high
TCGA-DD-A39W-01A	27.5667	1	0.772943	low
TCGA-DD-A39X-01A	56.4667	1	1.37253	high
TCGA-DD-A39Y-01A	5.7	1	6.52975	high
TCGA-DD-A39Z-01A	20.0333	1	1.68364	high
TCGA-DD-A3A1-01A	7.76667	1	2.39276	high
TCGA-DD-A3A2-01A	71.0333	1	0.293206	low
TCGA-DD-A3A3-01A	17.8333	1	0.869636	low
TCGA-DD-A3A4-01A	20.4	1	1.03285	low
TCGA-DD-A3A5-01A	104.167	1	1.05979	high
TCGA-DD-A3A6-01A	108.6	1	0.288954	low
TCGA-DD-A3A7-01A	13.9667	1	1.05128	high
TCGA-DD-A3A9-01A	31.0333	1	0.87016	low
TCGA-DD-A4NA-01A	33.6	0	0.464943	low
TCGA-DD-A4NB-01A	32.9667	0	0.356675	low
TCGA-DD-A4ND-01A	91.5333	0	1.08116	high
TCGA-DD-A4NE-01A	22	1	1.12916	high
TCGA-DD-A4NF-01A	31.4	0	0.467151	low
TCGA-DD-A4NG-01A	26.7333	1	0.269953	low
TCGA-DD-A4NH-01A	30.5667	0	1.48372	high
TCGA-DD-A4NI-01A	27.2	0	0.46432	low
TCGA-DD-A4NJ-01A	30.9333	0	1.05042	high
TCGA-DD-A4NK-01A	40.3333	1	0.516565	low
TCGA-DD-A4NL-01A	57.0333	0	0.231893	low
TCGA-DD-A4NN-01A	29.9667	1	1.14912	high
TCGA-DD-A4NO-01A	74.8333	0	0.597496	low
TCGA-DD-A4NP-01A	110.267	0	0.314012	low
TCGA-DD-A4NQ-01A	12.4333	1	3.13953	high
TCGA-DD-A4NS-01A	81.8667	1	0.499448	low
TCGA-DD-A4NV-01A	79.9333	0	0.739416	low
TCGA-DD-A73A-01A	24.2667	0	1.12883	high
TCGA-DD-A73B-01A	9.43333	1	1.51917	high
TCGA-DD-A73C-01A	23.3667	0	0.65276	low
TCGA-DD-A73D-01A	23.1	0	1.35164	high
TCGA-DD-A73E-01A	1.46667	0	0.650802	low
TCGA-DD-A73F-01A	36.1667	0	0.916915	low
TCGA-DD-A73G-01A	115.933	0	0.301058	low
TCGA-DD-AA3A-01A	13.6667	1	1.69534	high
TCGA-DD-AAC9-01A	11.5667	0	1.0477	high
TCGA-DD-AACA-01A	76.7	0	0.447264	low
TCGA-DD-AACB-01A	77.4667	0	1.62982	high
TCGA-DD-AACC-01A	56.1667	1	1.35211	high
TCGA-DD-AACD-01A	12.7	1	1.02659	low
TCGA-DD-AACE-01A	72.8	0	0.596608	low
TCGA-DD-AACF-01A	12.1667	1	0.656101	low
TCGA-DD-AACG-01A	15.6333	1	1.99371	high
TCGA-DD-AACH-01A	6.5	1	2.67842	high
TCGA-DD-AACI-01A	53.9333	0	1.16368	high
TCGA-DD-AACJ-01A	70.0667	0	0.653727	low
TCGA-DD-AACL-01A	3.56667	1	7.97874	high
TCGA-DD-AACN-01A	43.4	0	0.301859	low
TCGA-DD-AACO-01A	62.5333	0	0.833447	low
TCGA-DD-AACP-01A	13.8333	0	1.89257	high
TCGA-DD-AACQ-01A	14.4	1	1.14905	high
TCGA-DD-AACS-01A	60.1333	0	1.10411	high
TCGA-DD-AACT-01A	52.0667	0	1.2838	high
TCGA-DD-AACU-01A	52.2333	0	1.36746	high
TCGA-DD-AACV-01A	51.0333	0	1.10876	high
TCGA-DD-AACW-01A	47.4667	0	1.0051	low
TCGA-DD-AACX-01A	5.66667	0	1.52761	high
TCGA-DD-AACY-01A	48.3333	0	0.729193	low
TCGA-DD-AACZ-01A	5.7	1	2.73795	high
TCGA-DD-AAD0-01A	4.56667	0	0.588631	low
TCGA-DD-AAD1-01A	18.8	0	0.877522	low
TCGA-DD-AAD2-01A	21.9333	0	1.38328	high
TCGA-DD-AAD3-01A	43.1667	0	0.727403	low
TCGA-DD-AAD5-01A	44.8333	0	1.95413	high
TCGA-DD-AAD6-01A	22.4	0	0.944284	low
TCGA-DD-AAD8-01A	40.6333	0	0.722941	low
TCGA-DD-AADA-01A	41.1	0	0.283078	low
TCGA-DD-AADB-01A	41.4	0	2.4397	high
TCGA-DD-AADC-01A	14.1667	1	5.73237	high
TCGA-DD-AADD-01A	41.0333	0	1.97336	high
TCGA-DD-AADF-01A	3.83333	1	2.93903	high
TCGA-DD-AADG-01A	38.1667	0	0.586631	low
TCGA-DD-AADI-01A	36.1667	0	0.641277	low
TCGA-DD-AADJ-01A	35.5333	0	0.455634	low
TCGA-DD-AADK-01A	34.9667	0	1.39364	high
TCGA-DD-AADL-01A	21.2	0	1.3239	high
TCGA-DD-AADN-01A	29.9333	0	5.78198	high
TCGA-DD-AADO-01A	15.1	0	1.80165	high
TCGA-DD-AADP-01A	15.2667	0	0.30978	low
TCGA-DD-AADQ-01A	14.5333	0	0.717579	low
TCGA-DD-AADR-01A	67.6	0	0.653695	low
TCGA-DD-AADS-01A	15.8	0	0.409364	low
TCGA-DD-AADU-01A	18.4667	0	0.254659	low
TCGA-DD-AADV-01A	19.1333	0	1.19359	high
TCGA-DD-AADW-01A	19.5667	0	1.16242	high
TCGA-DD-AADY-01A	18.5	0	0.347453	low
TCGA-DD-AAE0-01A	18.5	0	2.04829	high
TCGA-DD-AAE1-01A	18.4	0	0.827646	low
TCGA-DD-AAE2-01A	21.2667	0	0.844232	low
TCGA-DD-AAE3-01A	18.8667	0	0.362984	low
TCGA-DD-AAE4-01A	20.2667	0	0.520603	low
TCGA-DD-AAE6-01A	4.7	0	1.387	high
TCGA-DD-AAE7-01A	21.4667	0	0.776998	low
TCGA-DD-AAE9-01A	24.0667	0	0.900529	low
TCGA-DD-AAEA-01A	19.1667	0	0.997699	low
TCGA-DD-AAEB-01A	15.9333	0	0.128121	low
TCGA-DD-AAED-01A	25.4333	0	0.365759	low
TCGA-DD-AAEE-01A	27	0	0.685471	low
TCGA-DD-AAEG-01A	23.9667	0	1.02658	low
TCGA-DD-AAEH-01A	26.1333	0	0.938496	low
TCGA-DD-AAEI-01A	51.0333	0	2.08429	high
TCGA-DD-AAEK-01A	35.5667	0	0.297508	low
TCGA-DD-AAVP-01A	91.7333	0	0.954507	low
TCGA-DD-AAVQ-01A	90.9333	0	1.22465	high
TCGA-DD-AAVR-01A	83.7667	0	0.594362	low
TCGA-DD-AAVS-01A	60.7667	0	0.64661	low
TCGA-DD-AAVU-01A	73.4	0	0.837068	low
TCGA-DD-AAVV-01A	81.8333	0	1.31596	high
TCGA-DD-AAVW-01A	77.2333	0	0.581266	low
TCGA-DD-AAVX-01A	57.2667	0	0.53196	low
TCGA-DD-AAVY-01A	65.6667	0	0.291328	low
TCGA-DD-AAVZ-01A	63.3333	0	1.0693	high
TCGA-DD-AAW0-01A	67.1667	0	0.487817	low
TCGA-DD-AAW1-01A	66.3	0	0.407983	low
TCGA-DD-AAW2-01A	61.8333	0	0.253022	low
TCGA-DD-AAW3-01A	54.4333	0	0.65148	low
TCGA-ED-A459-01A	30.3333	0	1.86011	high
TCGA-ED-A4XI-01A	27.3	0	0.280104	low
TCGA-ED-A5KG-01A	28.4667	0	1.07769	high
TCGA-ED-A627-01A	14.1	0	0.506715	low
TCGA-ED-A66X-01A	13.5333	0	1.2744	high
TCGA-ED-A66Y-01A	9.86667	1	1.08997	high
TCGA-ED-A7PY-01A	13	0	0.310562	low
TCGA-ED-A7XO-01A	14.2333	0	1.48176	high
TCGA-ED-A7XP-01A	13.3333	0	1.00241	low
TCGA-ED-A82E-01A	13.6	0	0.299037	low
TCGA-ED-A8O5-01A	13.5333	0	0.482698	low
TCGA-ED-A8O6-01A	1.86667	1	2.36452	high
TCGA-EP-A12J-01A	19	0	0.635385	low
TCGA-EP-A26S-01A	20.2667	0	0.572035	low
TCGA-EP-A2KA-01A	20.9	1	1.01732	low
TCGA-EP-A2KB-01A	19.8667	1	1.39904	high
TCGA-EP-A3JL-01A	10.1	0	1.49166	high
TCGA-EP-A3RK-01A	12.1	0	1.27208	high
TCGA-ES-A2HS-01A	22.9333	1	0.465291	low
TCGA-ES-A2HT-01A	14.6	1	1.27995	high
TCGA-FV-A23B-01A	61.7333	1	0.601645	low
TCGA-FV-A2QQ-01A	24.3	0	0.908135	low
TCGA-FV-A2QR-01A	19.3667	1	1.86196	high
TCGA-FV-A3I0-01A	28.2667	0	0.288382	low
TCGA-FV-A3I1-01A	8.23333	1	1.94544	high
TCGA-FV-A3R2-01A	6.46667	1	1.97071	high
TCGA-FV-A3R3-01A	12.2	1	0.235889	low
TCGA-FV-A4ZP-01A	82.8667	1	3.15595	high
TCGA-G3-A25S-01A	13.8667	1	1.86273	high
TCGA-G3-A25T-01A	51.7667	0	1.26979	high
TCGA-G3-A25U-01A	54.5333	0	0.776182	low
TCGA-G3-A25V-01A	28.6667	0	0.823972	low
TCGA-G3-A25X-01A	59.3	0	1.49591	high
TCGA-G3-A25Y-01A	15.0667	1	1.05122	high
TCGA-G3-A25Z-01A	21.8333	0	1.23647	high
TCGA-G3-A3CG-01A	22.4333	0	1.07712	high
TCGA-G3-A3CH-01A	26	0	0.876784	low
TCGA-G3-A3CI-01A	6	0	0.266037	low
TCGA-G3-A3CJ-01A	19.8	0	0.63979	low
TCGA-G3-A3CK-01A	19.5	0	0.537479	low
TCGA-G3-A5SI-01A	25.6	1	2.49529	high
TCGA-G3-A5SJ-01A	23.2667	0	2.06261	high
TCGA-G3-A5SK-01A	24.8	0	0.443176	low
TCGA-G3-A5SL-01A	20.7	0	0.513425	low
TCGA-G3-A5SM-01A	17.3333	0	0.797582	low
TCGA-G3-A6UC-01A	22.3667	0	0.223169	low
TCGA-G3-A7M5-01A	14.9	0	0.474576	low
TCGA-G3-A7M6-01A	21.0667	0	1.03481	high
TCGA-G3-A7M7-01A	12.0333	0	1.118	high
TCGA-G3-A7M8-01A	14.3333	0	0.530014	low
TCGA-G3-A7M9-01A	1.86667	1	8.87403	high
TCGA-G3-AAUZ-01A	16	0	0.694405	low
TCGA-G3-AAV0-01A	15.8667	0	0.684329	low
TCGA-G3-AAV1-01A	11.9667	1	0.494604	low
TCGA-G3-AAV2-01A	12.4	0	0.769263	low
TCGA-G3-AAV3-01A	13.7333	0	1.50466	high
TCGA-G3-AAV5-01A	11.8	0	2.11156	high
TCGA-G3-AAV6-01A	2.16667	1	1.74917	high
TCGA-G3-AAV7-01A	12.0333	0	4.81267	high
TCGA-GJ-A3OU-01A	29.3	0	1.44009	high
TCGA-GJ-A6C0-01A	1.03333	1	1.98149	high
TCGA-GJ-A9DB-01A	2.23333	1	0.897559	low
TCGA-HP-A5MZ-01A	3.03333	1	1.12112	high
TCGA-HP-A5N0-01A	25.0667	1	0.669106	low
TCGA-K7-A5RF-01A	21.0333	0	0.411875	low
TCGA-K7-A5RG-01A	17.3	0	2.50887	high
TCGA-K7-A6G5-01A	17.0667	0	1.19332	high
TCGA-K7-AAU7-01A	11.9667	0	2.01247	high
TCGA-KR-A7K0-01A	2.16667	1	0.84684	low
TCGA-KR-A7K2-01A	27.6333	0	0.555729	low
TCGA-KR-A7K7-01A	31.7	0	2.08592	high
TCGA-KR-A7K8-01A	30.2	0	1.4177	high
TCGA-LG-A6GG-01A	12.9	0	1.09728	high
TCGA-LG-A9QC-01A	14.1667	0	0.496596	low
TCGA-LG-A9QD-01A	12.2	0	0.469908	low
TCGA-MI-A75C-01A	9.7	0	1.51336	high
TCGA-MI-A75E-01A	16.9	0	1.35223	high
TCGA-MI-A75G-01A	23.2667	0	1.84074	high
TCGA-MI-A75H-01A	24.9	0	0.637754	low
TCGA-MI-A75I-01A	21	0	2.15275	high
TCGA-MR-A520-01A	7.63333	0	0.23131	low
TCGA-MR-A8JO-01A	11	0	0.535204	low
TCGA-NI-A4U2-01A	59.7	1	0.79694	low
TCGA-NI-A8LF-01A	26.6333	0	0.255965	low
TCGA-O8-A75V-01A	17.9333	0	1.01559	low
TCGA-PD-A5DF-01A	21.3	1	0.922994	low
TCGA-QA-A7B7-01A	3.13333	0	2.40166	high
TCGA-RC-A7S9-01A	21.3333	0	1.25342	high
TCGA-RC-A7SB-01A	19.6	0	1.0652	high
TCGA-RC-A7SF-01A	19.3	0	0.663439	low
TCGA-RC-A7SH-01A	15.6	0	0.732721	low
TCGA-RC-A7SK-01A	15.7333	0	0.374203	low
TCGA-RG-A7D4-01A	36.6	0	1.46824	high
TCGA-UB-A7MA-01A	28.2667	0	1.47423	high
TCGA-UB-A7MB-01A	20.0333	0	1.43733	high
TCGA-UB-A7MC-01A	16.6667	0	0.447059	low
TCGA-UB-A7MD-01A	1.73333	1	1.65955	high
TCGA-UB-A7ME-01A	16.2	0	1.12425	high
TCGA-UB-A7MF-01A	7.13333	1	1.20593	high
TCGA-UB-AA0U-01A	10.9	0	0.572778	low
TCGA-UB-AA0V-01A	10.4667	0	0.436974	low
TCGA-WJ-A86L-01A	11.5	0	0.897179	low
TCGA-WQ-A9G7-01A	1	0	2.7026	high
TCGA-WQ-AB4B-01A	13.1667	0	0.681526	low
TCGA-WX-AA44-01A	20.5	0	1.32912	high
TCGA-WX-AA46-01A	25.2	0	0.506185	low
TCGA-WX-AA47-01A	18.5333	1	0.376871	low
TCGA-XR-A8TC-01A	44.6333	0	0.280889	low
TCGA-XR-A8TD-01A	34.3333	0	1.98492	high
TCGA-XR-A8TE-01A	30.8333	0	0.259813	low
TCGA-XR-A8TF-01A	23.1	1	0.34478	low
TCGA-XR-A8TG-01A	29.9333	0	0.822076	low
TCGA-YA-A8S7-01A	13.7333	1	2.84722	high
TCGA-ZP-A9CV-01A	36.2667	1	1.1285	high
TCGA-ZP-A9CY-01A	26.0667	0	0.492444	low
TCGA-ZP-A9CZ-01A	23.5333	0	1.45722	high
TCGA-ZP-A9D0-01A	36.3667	0	0.204381	low
TCGA-ZP-A9D2-01A	25.5	1	1.58171	high
TCGA-ZP-A9D4-01A	13.1667	0	0.520233	low
TCGA-ZS-A9CD-01A	46.2	1	0.97293	low
TCGA-ZS-A9CE-01A	41.3667	0	0.925768	low
TCGA-ZS-A9CF-01A	80.4	0	0.787858	low
TCGA-ZS-A9CG-01A	11.3667	0	0.21422	low

## Sheet: ICGC risk score
id	time	status	risk_score	risk
DO45161	18	1	544.775	high
DO45093	24	1	320.705	high
DO45211	8	0	196.401	high
DO45269	25	0	166.682	high
DO45307	8	1	165.586	high
DO45127	14	1	151.186	high
DO23519	21	0	147.158	high
DO45145	2	1	145.745	high
DO48741	8	0	144.132	high
DO45119	17	1	136.595	high
DO48747	18	0	133.379	high
DO48681	30	0	133.161	high
DO23508	13	0	129.8	high
DO45237	30	0	119.561	high
DO23525	35	0	118.95	high
DO45193	4	1	118.119	high
DO45139	44	0	116.084	high
DO50799	18	0	113.281	high
DO45245	8	1	112.964	high
DO50840	11	0	111.606	high
DO45299	48	0	104.107	high
DO50806	18	0	103.447	high
DO45209	45	0	99.4758	high
DO45225	35	0	98.1004	high
DO50809	24	1	97.7729	high
DO45267	19	1	97.2535	high
DO45221	13	1	96.509	high
DO50832	3	0	95.4024	high
DO45165	23	0	91.5652	high
DO48730	21	0	90.1451	high
DO45265	34	0	89.6828	high
DO45163	32	0	89.0532	high
DO45131	12	1	88.8272	high
DO45117	37	1	85.712	high
DO45187	42	0	85.0504	high
DO48757	16	0	84.629	high
DO23524	35	0	83.6301	high
DO45155	72	0	81.8524	high
DO50778	21	0	81.8089	high
DO23537	30	1	79.1903	high
DO45173	39	0	79.1719	high
DO48751	16	1	78.4522	high
DO45259	11	0	77.5077	high
DO50785	3	1	74.0792	high
DO45239	29	0	74.0277	high
DO48720	19	0	73.3853	high
DO23545	19	1	69.2123	high
DO45169	45	0	66.9633	high
DO45283	17	0	66.6354	high
DO45153	46	0	64.8397	high
DO48679	40	0	64.4189	high
DO45123	19	1	64.0659	high
DO48704	25	0	64.0026	high
DO45297	42	1	63.8066	high
DO45092	40	1	62.9571	high
DO45287	13	0	62.1835	high
DO48723	20	0	62.0277	high
DO48737	24	0	62.004	high
DO45219	36	0	61.907	high
DO45227	34	0	58.7818	high
DO50798	1	1	58.5671	high
DO48682	4	1	58.5272	high
DO23514	43	0	58.0761	high
DO23541	31	0	57.4952	high
DO48672	15	0	57.3668	high
DO45217	9	1	57.0141	high
DO48717	6	1	56.8298	high
DO45091	44	1	55.7072	high
DO45213	40	0	54.8561	high
DO45301	48	1	54.5789	high
DO50850	24	0	54.5617	high
DO45277	20	0	54.3331	high
DO23515	41	0	54.0669	high
DO45257	27	0	53.8389	high
DO48697	27	1	53.7395	high
DO48715	23	1	53.5135	high
DO48716	24	0	53.1241	high
DO48759	24	0	52.789	high
DO50825	13	0	51.2297	high
DO23513	40	0	50.5606	high
DO45115	28	0	49.6956	high
DO45231	31	0	49.128	high
DO23552	27	0	48.4066	high
DO45135	47	0	48.0119	high
DO45235	30	0	46.8495	high
DO45099	53	0	46.569	high
DO48695	24	0	45.2336	high
DO23518	44	0	45.0943	high
DO50774	24	0	44.8008	high
DO45223	34	0	44.4884	high
DO23530	6	1	44.2244	high
DO45247	7	0	44.1749	high
DO48743	19	0	44.1298	high
DO50844	10	0	43.8767	high
DO45105	56	0	43.7015	high
DO50857	7	0	43.4066	high
DO23529	31	0	43.1194	high
DO50803	18	0	43.0976	high
DO50822	17	0	43.0048	high
DO45249	21	0	42.2107	high
DO50808	19	0	42.2043	high
DO48701	26	0	41.9775	high
DO23533	30	0	41.8584	low
DO45113	52	0	41.617	low
DO50805	23	0	41.5712	low
DO45183	19	1	41.4695	low
DO50813	14	0	40.7514	low
DO48732	21	0	40.545	low
DO50802	31	0	40.223	low
DO50820	17	0	40.1871	low
DO48700	27	0	39.999	low
DO23542	32	0	39.8975	low
DO45253	29	0	39.7126	low
DO45263	9	1	38.8969	low
DO48725	26	0	38.0757	low
DO45159	49	0	37.9241	low
DO45179	20	0	37.4587	low
DO45143	43	0	37.3428	low
DO45175	38	0	37.2884	low
DO23523	36	0	36.8725	low
DO23535	32	0	36.8533	low
DO45095	54	0	36.8193	low
DO50791	16	1	36.8073	low
DO23510	29	0	36.5891	low
DO45149	42	0	35.7554	low
DO23526	35	0	35.7025	low
DO45289	12	0	34.8637	low
DO48761	29	0	34.7493	low
DO45199	45	0	34.7268	low
DO45203	39	0	34.5239	low
DO45281	25	0	34.3264	low
DO23528	34	0	34.3157	low
DO23527	35	0	33.8543	low
DO23511	6	1	33.6568	low
DO45129	49	0	33.5175	low
DO50814	14	0	32.7948	low
DO227801	22	0	32.664	low
DO50776	23	0	32.3797	low
DO48728	5	0	32.3781	low
DO45121	51	0	32.291	low
DO45189	40	0	31.9122	low
DO23543	34	0	31.4719	low
DO45103	15	0	31.4706	low
DO23536	31	0	31.3573	low
DO23509	26	1	31.2101	low
DO45197	39	0	31.1414	low
DO48721	30	0	31.011	low
DO45285	16	0	30.4696	low
DO23547	34	0	30.4105	low
DO50800	17	0	30.1263	low
DO48712	27	0	29.5771	low
DO45177	42	0	29.4287	low
DO45191	40	0	29.1144	low
DO45137	44	0	28.843	low
DO48736	20	0	28.785	low
DO23550	33	0	28.3692	low
DO50859	6	0	28.1195	low
DO50818	17	0	27.4451	low
DO45243	31	0	27.1946	low
DO45111	53	0	27.0918	low
DO50855	19	0	25.5836	low
DO23540	25	0	25.2373	low
DO45133	22	1	24.9987	low
DO50807	18	0	24.898	low
DO45096	43	1	24.7132	low
DO45305	10	0	24.2542	low
DO45141	44	0	24.0501	low
DO50787	16	0	23.821	low
DO45303	33	0	23.7666	low
DO50789	19	0	23.6295	low
DO48733	20	0	22.8413	low
DO45097	54	0	22.0761	low
DO50804	24	0	22.0306	low
DO48727	13	1	21.6468	low
DO45261	33	0	20.406	low
DO50793	18	0	20.2833	low
DO48706	29	0	20.004	low
DO45094	55	0	19.6747	low
DO45195	13	0	18.2	low
DO45167	48	1	18.1281	low
DO45125	56	0	17.7299	low
DO45171	20	0	17.5886	low
DO45109	53	0	17.0147	low
DO23538	15	0	16.8498	low
DO45181	40	0	16.3472	low
DO50783	16	0	16.1346	low
DO23512	42	0	15.4022	low
DO45251	30	0	15.1911	low
DO50816	13	0	14.8	low
DO45101	56	0	14.4285	low
DO227643	42	0	13.9874	low
DO23517	40	0	13.0144	low
DO48746	19	0	12.6711	low
DO45279	43	0	12.1931	low
DO23551	5	1	11.5748	low
DO45215	39	0	10.8651	low
DO23531	30	0	10.7547	low
DO48719	23	0	9.7168	low
DO48677	38	0	9.52271	low
DO45107	57	0	9.36966	low
DO23548	28	0	9.10985	low
DO23532	32	0	9.10158	low
DO48674	42	0	7.80081	low
DO23534	28	0	7.15763	low

## Sheet: luciferase activity
group	luciferase activity
circRNA_MUT+miRNA_control	1.00197
	1.17099
	1.00906
circRNA_MUT+miRNA_mimics	0.960591
	1.08894
	0.839883
circRNA_WT+miRNA_control	1.06075
	1.18851
	1.08962
circRNA_WT+miRNA_mimics	0.507472
	0.412563
	0.530165
